# Supplementary material for: neoepiscope improves neoepitope prediction with multivariant phasing
Source: Oxford University Press journal article supplement (doi:10.1093/bioinformatics/btz653), 2019-08-16
Supplement: bioinformatics_36_3_713_s7.zip [file bioinformatics_36_3_713_s7.zip]

Archive with 3 entries (3 files):
- Supplementary File 2.xlsx
- Supplementary File 3.tsv
- Supplementary File 1.pdf
